# Supplementary material
Source: publisher figshare collection journal article supplement (https://karger.figshare.com/articles/dataset/_/7334633)

Novel Insights from Clinical Practice

# Mismatch Repair Deficiency Drives Durable Complete Remission by Targeting Programmed Death Receptor 1 in a Metastatic Luminal Breast Cancer Patient

Carlo Fremd<sup>a</sup> Mario Hlevnjak<sup>b</sup> Marc Zapatka<sup>b</sup> Inka Zoernig<sup>a</sup> Niels Halama<sup>a</sup> Nino Fejzibegovic<sup>a</sup> Verena Thewes<sup>b</sup> Peter Lichter<sup>b</sup> Peter Schirmacher<sup>c</sup> Matthias Kloor<sup>c</sup> Frederik Marmé<sup>d</sup> Florian Schütz<sup>d</sup> Zeynep Kosaloglu<sup>e</sup> Hans Peter Sinn<sup>c</sup> Dirk Jäger<sup>a</sup> Andreas Schneeweiss<sup>a</sup>

<sup>a</sup>National Center for Tumor Diseases, Department of Medical Oncology, University of Heidelberg, Heidelberg, Germany; <sup>b</sup>Division of Molecular Genetics, German Cancer Research Center, Heidelberg, Germany; <sup>c</sup>Department of Applied Tumor Biology, Institute of Pathology, University of Heidelberg, Heidelberg, Germany; <sup>d</sup>Department of Obstetrics and Gynecology, University of Heidelberg, Heidelberg, Germany; <sup>e</sup>Department of Vaccine Discovery, La Jolla Institute for Allergy and Immunology, La Jolla, CA, USA

**Suppl. table 1.** Identified somatic mutations by whole exome sequencing

**Suppl. table 2.** Predicted neoantigens with high-affinity binding

*Please see xls files.*

**Suppl. fig. 1.** Intermutation distances of somatic mutations.

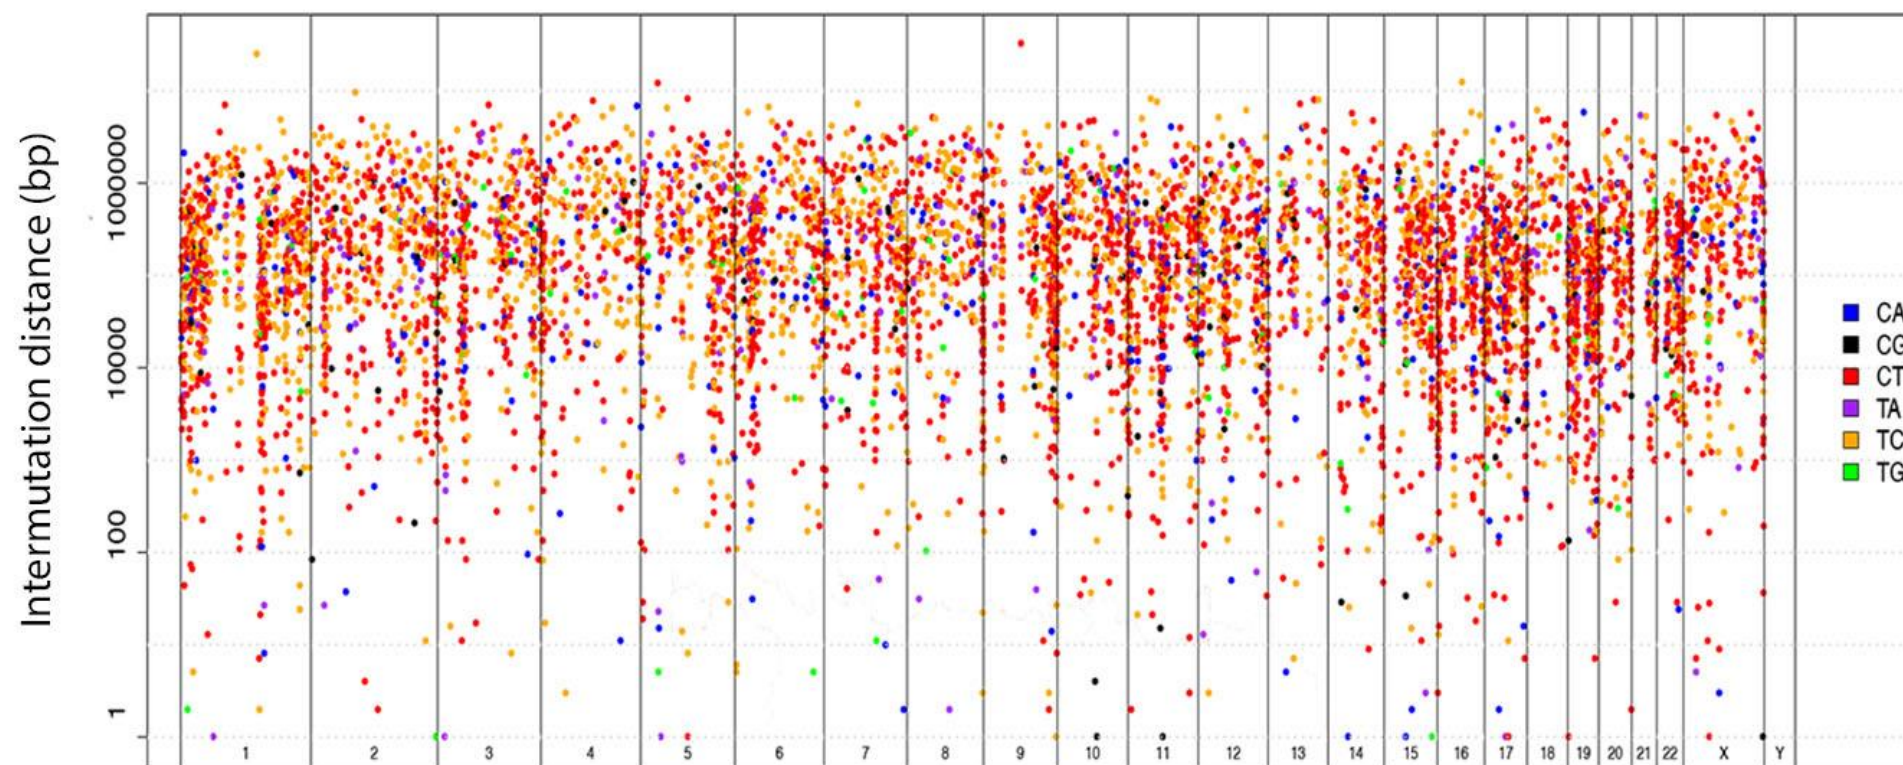

Supplement: Supplementary file 1 [file 1]
